# Supplementary material for: Biological and growth parameters of Plotosus lineatus in the Mediterranean Sea
Source: PeerJ. 2024 Feb 21;12:e16945. doi: 10.7717/peerj.16945 (PMC10893861; doi:10.7717/peerj.16945)
Supplement: Supplemental Information 1 — All samples total length, weight, sex and ages. [file peerj-12-16945-s001.xlsx]

## Sheet: Sayfa1
NO	TL (cm)	W (g)	Sex	Age
1	5.1	2.9	F	0
2	5.2	3.3	F	0
3	5.4	3.2	F	0
4	5.7	4.1	M	0
5	5.8	4.2	M	0
6	5.9	4.5	F	0
7	5.9	4.5	M	0
8	6.1	4.3	M	0
9	6.8	6.1	F	0
10	6.9	6.3	M	0
11	7.2	6.8	M	0
12	7.5	7.2	F	0
13	7.7	8.1	F	0
14	7.8	8.3	M	0
15	7.8	8	M	0
16	8.1	9.3	F	0
17	8.4	9.25	F	1
18	8.8	11.1	F	1
19	8.8	10.9	F	1
20	9.1	10.8	F	1
21	9.2	11.5	F	1
22	9.3	11.5	F	1
23	9.4	12.26	F	1
24	9.5	12.11	F	1
25	9.5	12.48	F	1
26	10	13.76	F	1
27	10	14.5	F	1
28	10.2	14.35	F	1
29	10.2	14.13	M	1
30	10.2	14.35	M	1
31	10.2	14.13	M	1
32	10.2	14.35	M	1
33	10.2	15.13	M	1
34	10.2	14.35	F	1
35	10.2	14.13	M	1
36	10.4	16.17	M	1
37	10.4	16.37	M	1
38	10.4	16.38	F	1
39	10.4	16.17	F	1
40	10.4	16.37	F	1
41	10.4	16.38	F	1
42	10.4	16.17	F	1
43	10.4	16.37	M	1
44	10.4	16.38	M	1
45	10.4	16.17	M	1
46	10.4	16.37	F	1
47	10.5	15.22	F	2
48	10.5	15.54	F	2
49	10.5	15.22	F	2
50	10.5	16.54	F	2
51	10.5	15.22	F	2
52	10.5	15.25	F	2
53	10.6	15.84	F	2
54	10.6	15.9	M	2
55	10.6	16.21	M	2
56	10.6	15.24	M	2
57	10.6	15.84	M	2
58	10.6	15.9	M	2
59	10.6	16.21	F	2
60	10.6	15.24	F	2
61	10.7	16.1	M	2
62	10.7	15.8	M	2
63	10.7	16.1	M	2
64	10.7	15.8	M	2
65	10.8	16.59	M	2
66	10.8	16.59	F	2
67	11	17.59	F	2
68	11	17.66	F	2
69	11	17.96	F	2
70	11	17.63	F	2
71	11	17.51	F	2
72	11	17.5	F	2
73	11	18.09	M	2
74	11	17.4	F	2
75	11	17.99	F	2
76	11	18.28	F	2
77	11	17.49	F	2
78	11	17.85	F	2
79	11	17.8	F	2
80	11	18.07	F	2
81	11	17.85	F	2
82	11	17.66	F	2
83	11	17.59	F	2
84	11	17.66	F	2
85	11	17.96	F	2
86	11	17.63	F	2
87	11	17.51	F	2
88	11	17.5	F	2
89	11	18.09	F	2
90	11	17.4	M	2
91	11	17.99	M	2
92	11	18.28	M	2
93	11	17.49	M	2
94	11	17.85	M	2
95	11	17.8	F	2
96	11	18.07	M	2
97	11	17.85	M	2
98	11	17.66	M	2
99	11.1	17.62	F	2
100	11.1	18.13	F	2
101	11.1	17.93	F	2
102	11.1	18.42	F	2
103	11.1	18.62	F	2
104	11.1	18.13	M	2
105	11.1	17.93	M	2
106	11.1	18.42	M	2
107	11.2	18.59	F	2
108	11.2	18.18	F	2
109	11.2	17.66	F	2
110	11.2	18.07	F	2
111	11.2	18.67	F	2
112	11.2	18.02	F	2
113	11.2	17.95	F	2
114	11.2	18.2	F	2
115	11.2	18.59	M	2
116	11.2	18.18	M	2
117	11.2	17.66	M	2
118	11.2	18.07	M	2
119	11.2	18.67	M	2
120	11.2	18.02	F	2
121	11.2	17.95	F	2
122	11.2	18.2	M	2
123	11.3	19.12	M	2
124	11.3	18.56	M	2
125	11.3	18.1	M	2
126	11.3	18.7	M	2
127	11.3	18.26	F	2
128	11.3	18.47	F	2
129	11.3	19.12	F	2
130	11.3	18.56	F	2
131	11.3	18.1	F	2
132	11.3	18.7	F	2
133	11.3	18.26	F	2
134	11.3	18.47	M	2
135	11.4	18.78	F	2
136	11.4	18.43	F	2
137	11.4	18.59	F	2
138	11.4	18.36	F	2
139	11.4	18.38	F	2
140	11.4	18.11	F	2
141	11.4	18.28	F	2
142	11.4	18.43	F	2
143	11.4	18.59	F	2
144	11.4	18.36	F	2
145	11.4	18.38	F	2
146	11.4	18.11	F	2
147	11.5	19.1	F	2
148	11.5	19.59	F	2
149	11.5	19.13	F	2
150	11.5	19.43	F	2
151	11.5	19.27	M	2
152	11.5	19.78	M	2
153	11.5	19.8	M	2
154	11.5	19.98	M	2
155	11.5	19.84	M	2
156	11.5	19.65	F	2
157	11.5	19.3	M	2
158	11.5	19.34	M	2
159	11.5	19.88	M	2
160	11.5	19.83	F	2
161	11.5	20.38	F	2
162	11.5	19.16	F	2
163	11.5	19.56	F	2
164	11.5	19.19	F	2
165	11.5	19.95	M	2
166	11.5	19.88	M	2
167	11.5	19.1	M	2
168	11.5	19.59	F	2
169	11.5	20.13	F	2
170	11.5	19.43	F	2
171	11.5	20.27	F	2
172	11.5	19.78	F	2
173	11.5	19.8	F	2
174	11.5	19.98	F	2
175	11.5	19.84	F	2
176	11.5	19.65	M	2
177	11.5	19.3	M	2
178	11.5	20.34	M	2
179	11.5	19.88	M	2
180	11.5	19.83	M	2
181	11.5	20.38	F	2
182	11.5	19.16	F	2
183	11.5	19.56	M	2
184	11.5	19.19	M	2
185	11.5	19.95	M	2
186	11.5	19.88	M	2
187	11.6	20	M	2
188	11.6	19.65	F	2
189	11.6	20.1	F	2
190	11.6	19.89	F	2
191	11.6	20.06	F	2
192	11.6	20.6	F	2
193	11.6	19.99	F	2
194	11.6	19.74	F	2
195	11.6	20.67	M	2
196	11.6	20	F	2
197	11.6	19.65	F	2
198	11.6	20.1	F	2
199	11.6	19.89	F	2
200	11.6	20.06	F	2
201	11.6	20.6	F	2
202	11.6	19.99	F	2
203	11.6	19.74	F	2
204	11.6	20.67	F	2
205	11.7	20.05	F	2
206	11.7	21.31	F	2
207	11.7	20.92	F	2
208	11.7	20.64	F	2
209	11.7	20.17	F	2
210	11.7	20.74	F	2
211	11.7	20.09	F	2
212	11.7	20.29	M	2
213	11.7	20.52	M	2
214	11.7	20.05	M	2
215	11.7	20.31	M	2
216	11.7	20.92	M	2
217	11.7	20.64	F	2
218	11.7	20.17	M	2
219	11.7	20.24	M	2
220	11.7	20.09	M	2
221	11.7	20.29	F	2
222	11.7	20.52	F	2
223	11.8	20.22	F	2
224	11.8	21.33	F	2
225	11.8	20.93	F	2
226	11.8	20.72	M	2
227	11.8	21.12	M	2
228	11.8	20.22	M	2
229	11.8	21.33	F	2
230	11.8	20.93	F	2
231	11.8	20.72	F	2
232	11.8	21.12	F	2
233	11.9	21.34	F	2
234	11.9	21.41	F	2
235	11.9	20.34	F	2
236	11.9	21.1	F	2
237	11.9	19.84	M	2
238	11.9	19.91	M	2
239	11.9	20.34	M	2
240	11.9	21.1	M	2
241	12	21.49	M	2
242	12	21.83	F	2
243	12	21.92	F	2
244	12	21.7	M	2
245	12	21	M	2
246	12	22.86	M	2
247	12	21.13	M	2
248	12	21.47	M	2
249	12	21.7	F	2
250	12	21.6	F	2
251	12	21.38	F	2
252	12	21.08	F	2
253	12	20.57	F	2
254	12	20.83	F	2
255	12	20.52	F	2
256	12	21.43	M	2
257	12	20.85	F	2
258	12	20.73	F	2
259	12	21.64	F	2
260	12	20.96	F	2
261	12	20.88	F	2
262	12	21.5	F	2
263	12	20.66	F	2
264	12	20.6	F	2
265	12	20.49	F	2
266	12	20.85	F	2
267	12	20.13	F	2
268	12	20.54	F	2
269	12	21.4	F	2
270	12	21.7	F	2
271	12	21.9	F	2
272	12	21.5	F	2
273	12	21.25	M	2
274	12	20.49	M	2
275	12	21.83	M	2
276	12	21.92	M	2
277	12	21.9	M	2
278	12.1	22.65	M	3
279	12.1	22.27	M	3
280	12.1	21.36	M	3
281	12.1	21.69	F	3
282	12.1	21.55	F	3
283	12.1	21.25	F	3
284	12.1	22.95	F	3
285	12.1	21.64	F	3
286	12.1	21.72	F	3
287	12.1	22.65	F	3
288	12.1	22.27	M	3
289	12.1	21.36	F	3
290	12.1	21.69	F	3
291	12.1	21.55	F	3
292	12.1	21.25	F	3
293	12.1	22.95	F	3
294	12.1	21.64	F	3
295	12.1	21.72	F	3
296	12.2	22.8	F	3
297	12.2	23.03	F	3
298	12.2	22.48	M	3
299	12.2	22.44	M	3
300	12.2	22.95	M	3
301	12.2	22.39	M	3
302	12.2	22.07	M	3
303	12.2	22.84	M	3
304	12.2	22.87	M	3
305	12.2	23.11	F	3
306	12.2	23.43	F	3
307	12.2	23.12	F	3
308	12.2	23.04	F	3
309	12.2	23.94	F	3
310	12.2	22.76	F	3
311	12.2	23.67	F	3
312	12.2	22.77	F	3
313	12.2	22.8	F	3
314	12.2	23.03	F	3
315	12.2	22.48	F	3
316	12.2	22.44	F	3
317	12.2	22.95	F	3
318	12.2	22.39	F	3
319	12.2	22.07	F	3
320	12.2	22.84	F	3
321	12.2	22.87	F	3
322	12.2	23.11	M	3
323	12.2	23.43	M	3
324	12.2	23.12	M	3
325	12.2	23.04	M	3
326	12.2	23.94	M	3
327	12.2	22.76	M	3
328	12.2	23.67	M	3
329	12.2	22.77	M	3
330	12.2	22.95	F	3
331	12.2	22.39	M	3
332	12.2	22.07	F	3
333	12.2	22.84	F	3
334	12.2	22.87	F	3
335	12.2	23.11	M	3
336	12.2	23.43	M	3
337	12.2	23.12	F	3
338	12.2	23.04	M	3
339	12.2	23.94	F	3
340	12.2	22.76	F	3
341	12.2	23.67	F	3
342	12.2	22.77	M	3
343	12.3	23.12	M	3
344	12.3	22.88	F	3
345	12.3	23.29	M	3
346	12.3	22.3	F	3
347	12.3	22.89	F	3
348	12.3	23.98	F	3
349	12.3	22.9	M	3
350	12.3	22.11	M	3
351	12.3	22.8	F	3
352	12.3	23.12	M	3
353	12.3	22.88	F	3
354	12.3	23.29	F	3
355	12.3	22.3	F	3
356	12.3	22.89	M	3
357	12.3	23.98	M	3
358	12.3	22.9	M	3
359	12.3	22.11	M	3
360	12.3	22.8	F	3
361	12.3	23.12	M	3
362	12.3	22.88	F	3
363	12.3	23.29	F	3
364	12.3	22.3	F	3
365	12.3	22.89	M	3
366	12.4	22.88	M	3
367	12.4	22.2	F	3
368	12.4	23.22	M	3
369	12.4	22.37	F	3
370	12.4	22.02	F	3
371	12.4	23.8	F	3
372	12.4	22.52	M	3
373	12.4	23.17	M	3
374	12.4	22.23	M	3
375	12.4	22.93	M	3
376	12.4	22.88	F	3
377	12.4	22.2	M	3
378	12.4	23.22	F	3
379	12.4	22.37	F	3
380	12.4	22.02	F	3
381	12.4	23.8	M	3
382	12.4	22.52	M	3
383	12.4	23.17	F	3
384	12.4	22.23	M	3
385	12.4	22.93	F	3
386	12.5	22.02	F	3
387	12.5	22.8	F	3
388	12.5	22.84	M	3
389	12.5	22.14	M	3
390	12.5	22.71	F	3
391	12.5	23.29	F	3
392	12.5	23.3	F	3
393	12.5	22.19	M	3
394	12.5	22.43	M	3
395	12.5	22.36	F	3
396	12.5	22.93	M	3
397	12.5	22.79	F	3
398	12.5	23.42	F	3
399	12.5	23.7	F	3
400	12.5	23.47	F	3
401	12.5	22.5	F	3
402	12.5	22.91	F	3
403	12.5	22.02	M	3
404	12.5	22.8	M	3
405	12.5	22.84	F	3
406	12.5	22.14	M	3
407	12.5	22.71	F	3
408	12.5	23.29	F	3
409	12.5	23.3	F	3
410	12.5	22.19	F	3
411	12.5	22.43	F	3
412	12.5	22.36	F	3
413	12.5	22.93	M	3
414	12.5	22.79	M	3
415	12.5	23.42	F	3
416	12.5	23.7	M	3
417	12.5	23.47	F	3
418	12.5	22.5	F	3
419	12.5	22.91	F	3
420	12.6	23.94	F	3
421	12.6	23.55	F	3
422	12.6	23.13	F	3
423	12.6	23.64	F	3
424	12.6	24.28	F	3
425	12.6	23.85	F	3
426	12.6	23.71	M	3
427	12.6	22.85	M	3
428	12.6	23.94	F	3
429	12.6	23.55	M	3
430	12.6	23.13	F	3
431	12.6	23.64	F	3
432	12.6	24.28	F	3
433	12.6	23.85	F	3
434	12.6	23.71	F	3
435	12.6	22.85	F	3
436	12.7	23.14	M	3
437	12.7	23.53	M	3
438	12.7	23.09	F	3
439	12.7	23.71	M	3
440	12.7	23.54	F	3
441	12.7	23.14	F	3
442	12.7	23.53	F	3
443	12.7	23.09	F	3
444	12.7	23.71	F	3
445	12.7	23.54	F	3
446	12.8	24	F	3
447	12.8	23.77	F	3
448	12.8	24.3	F	3
449	12.8	24	M	3
450	12.8	23.77	M	3
451	12.8	24.3	F	3
452	12.9	24.45	M	3
453	12.9	24.45	F	3
454	13	25.94	F	3
455	13	25.67	F	3
456	13	25.9	F	3
457	13	25.61	F	3
458	13	25.82	F	3
459	13	25.19	M	3
460	13	25.94	M	3
461	13	25.67	F	3
462	13	25.9	M	3
463	13	25.61	F	3
464	13	25.82	F	3
465	13	25.19	F	3
466	13	25.67	F	3
467	13	25.9	F	3
468	13	25.61	F	3
469	13	25.82	F	3
470	13	25.19	F	3
471	13.1	26.85	F	3
472	13.1	26.97	M	3
473	13.1	26.9	M	3
474	13.1	27.2	F	3
475	13.1	26.27	M	3
476	13.1	26.85	F	3
477	13.1	26.97	F	3
478	13.1	26.9	F	3
479	13.1	27.2	F	3
480	13.1	26.27	F	3
481	13.1	26.85	F	3
482	13.1	26.97	M	3
483	13.1	26.9	M	3
484	13.1	27.2	F	3
485	13.1	26.27	M	3
486	13.2	26.7	F	3
487	13.2	27.2	F	3
488	13.2	26.61	F	3
489	13.2	27.5	F	3
490	13.2	26.33	M	3
491	13.2	26.86	M	3
492	13.2	26.7	F	3
493	13.2	27.2	M	3
494	13.2	26.61	F	3
495	13.2	27.5	F	3
496	13.2	26.33	F	3
497	13.2	26.86	F	3
498	13.2	26.7	F	3
499	13.2	27.2	F	3
500	13.2	26.61	F	3
501	13.2	27.5	F	3
502	13.2	26.33	F	3
503	13.2	26.86	M	3
504	13.3	27.45	M	3
505	13.3	27.38	F	3
506	13.3	27.45	M	3
507	13.3	27.38	F	3
508	13.3	27.45	F	3
509	13.3	27.38	F	3
510	13.4	27.76	F	3
511	13.4	26.99	F	3
512	13.4	27.76	F	3
513	13.4	26.99	F	3
514	13.4	27.76	M	3
515	13.4	26.99	M	3
516	13.5	27.82	F	3
517	13.5	27.38	M	3
518	13.5	27.31	F	3
519	13.5	26.88	F	3
520	13.5	27.84	F	3
521	13.5	27.55	F	3
522	13.5	27.82	F	3
523	13.5	27.38	F	3
524	13.5	27.31	F	3
525	13.5	26.88	F	3
526	13.5	27.84	F	3
527	13.5	27.55	M	3
528	13.5	27.82	M	3
529	13.5	27.38	F	3
530	13.5	27.31	M	3
531	13.6	27.84	F	3
532	13.6	27.84	F	3
533	13.7	29.62	F	3
534	13.7	29.2	F	3
535	13.7	28.2	F	3
536	13.7	29	F	3
537	13.7	28.9	F	3
538	13.7	29.62	F	3
539	13.7	29.2	F	3
540	13.7	28.2	F	3
541	13.7	29	F	3
542	13.7	28.9	M	3
543	13.9	29.3	M	3
544	13.9	29.3	F	3
545	13.9	29.3	M	3
546	13.9	29.3	F	3
547	13.9	29.3	F	3
548	13.9	29.3	F	3
549	13.9	29.3	F	3
550	13.9	29.3	F	3
551	14	31.88	F	3
552	14	31.93	M	3
553	14	30.9	M	3
554	14	31.88	F	3
555	14	31.93	M	3
556	14	30.9	F	3
557	14	31.88	F	3
558	14	31.93	F	3
559	14	30.9	F	3
560	14	31.88	M	3
561	14	31.93	M	3
562	14	30.9	F	3
563	14	31.88	M	3
564	14	31.93	F	3
565	14	32	F	3
566	14	31.88	F	3
567	14	31.93	F	3
568	14	31.5	F	3
569	14	31.2	F	3
570	14	31.6	F	3
571	14	31.9	F	3
572	14	31.8	F	3
573	14	31.2	M	3
574	14	31.6	M	3
575	14	31.88	F	3
576	14	31.93	M	3
577	14	30.9	F	3
578	14	31.88	F	3
579	14	31.93	F	3
580	14	30.9	F	3
581	14	31.88	F	3
582	14	31.93	F	3
583	14	30.9	F	3
584	14	31.88	M	3
585	14	31.93	M	3
586	14	30.9	F	3
587	14	31.88	M	3
588	14	31.93	F	3
589	14	32	F	3
590	14	31.88	F	3
591	14	31.93	F	3
592	14	31.5	F	3
593	14	31.2	F	3
594	14	31.6	F	3
595	14	31.9	F	3
596	14	31.8	F	3
597	14	31.2	M	3
598	14	31.6	M	3
599	14.2	31.9	F	3
600	14.2	31.8	M	3
601	14.2	31.5	F	3
602	14.2	33.1	F	3
603	14.2	33.3	F	3
604	14.2	32.9	F	3
605	14.2	32.1	F	3
606	14.2	33.5	F	3
607	14.2	33.6	F	3
608	14.2	32.9	F	3
609	14.2	32.8	F	3
610	14.2	32.5	F	3
611	14.2	33.1	F	3
612	14.2	33.3	M	3
613	14.2	32.9	M	3
614	14.2	32.1	F	3
615	14.2	33.5	M	3
616	14.2	33.6	F	3
617	14.3	32.77	F	3
618	14.3	32.77	F	3
619	14.3	32.77	F	3
620	14.3	32.77	F	3
621	14.3	32.1	F	3
622	14.3	32.3	M	3
623	14.3	32.6	M	3
624	14.3	33.4	F	3
625	14.3	31.1	M	3
626	14.3	31.2	F	3
627	14.3	31.5	F	3
628	14.3	31.8	F	3
629	14.3	31.9	F	3
630	14.3	32.5	M	3
631	14.3	32.1	M	3
632	14.3	32.1	F	3
633	14.3	32.2	M	3
634	14.3	31.9	F	3
635	14.3	30.9	F	3
636	14.3	31.1	F	3
637	14.3	32.2	F	3
638	14.3	31.2	F	3
639	14.3	32.77	F	3
640	14.3	32.77	F	3
641	14.3	32.77	F	3
642	14.3	32.77	F	3
643	14.3	32.1	M	3
644	14.3	32.3	M	3
645	14.3	32.6	F	3
646	14.3	33.4	M	3
647	14.3	31.1	F	3
648	14.3	31.2	F	3
649	14.3	31.5	F	3
650	14.3	31.8	F	3
651	14.3	31.9	F	3
652	14.3	32.5	F	3
653	14.3	32.1	F	3
654	14.3	32.1	M	3
655	14.3	32.2	M	3
656	14.3	31.9	F	3
657	14.3	30.9	M	3
658	14.3	31.1	F	3
659	14.3	32.2	F	3
660	14.3	31.2	F	3
661	14.4	32.2	F	3
662	14.4	32.3	F	3
663	14.4	32.6	F	3
664	14.4	32.9	F	3
665	14.4	32.4	F	3
666	14.4	33.1	F	3
667	14.4	33.2	M	3
668	14.4	33.2	M	3
669	14.4	33.1	F	3
670	14.4	32.2	M	3
671	14.4	32.6	F	3
672	14.4	32.7	F	3
673	14.4	32.2	F	3
674	14.4	32.3	F	3
675	14.4	32.6	F	3
676	14.4	32.9	F	3
677	14.4	32.4	M	3
678	14.4	33.1	F	3
679	14.4	33.2	F	3
680	14.4	33.2	F	3
681	14.4	33.1	F	3
682	14.4	32.2	F	3
683	14.4	32.6	F	3
684	14.4	32.7	F	3
685	14.5	33.5	F	3
686	14.5	33.5	F	3
687	14.5	32.4	M	3
688	14.5	33.2	M	3
689	14.5	33.5	F	3
690	14.5	32.4	M	3
691	14.5	33.2	F	3
692	14.5	33.5	F	3
693	14.5	32.4	F	3
694	14.5	33.2	F	3
695	14.5	33.6	F	3
696	14.5	33.7	F	3
697	14.5	33.2	F	3
698	14.5	32.2	F	3
699	14.5	32.9	F	3
700	14.5	32.2	F	3
701	14.5	32.3	F	3
702	14.5	32.5	M	3
703	14.5	31.5	M	3
704	14.5	32.2	F	3
705	14.5	32.2	M	3
706	14.5	32.2	F	3
707	14.5	32.6	F	3
708	14.5	32.7	F	3
709	14.5	32.9	F	3
710	14.5	33	F	3
711	14.5	34	F	3
712	14.5	34.1	M	3
713	14.5	33.5	M	3
714	14.5	33.5	F	3
715	14.5	32.4	M	3
716	14.5	33.2	F	3
717	14.5	33.5	F	3
718	14.5	32.4	F	3
719	14.5	33.2	F	3
720	14.5	33.5	M	3
721	14.5	32.4	M	3
722	14.5	33.2	F	3
723	14.5	33.6	M	3
724	14.5	33.7	F	3
725	14.5	33.2	F	3
726	14.5	32.2	F	3
727	14.5	32.9	F	3
728	14.5	32.2	F	3
729	14.5	32.3	F	3
730	14.5	32.5	F	3
731	14.5	31.5	F	3
732	14.5	32.2	F	3
733	14.5	32.2	M	3
734	14.5	32.2	M	3
735	14.5	32.6	M	3
736	14.5	32.7	M	3
737	14.5	32.9	M	3
738	14.5	33	M	3
739	14.5	34	F	3
740	14.5	34.1	F	3
741	14.6	33.2	F	3
742	14.6	33.2	F	3
743	14.6	34.1	F	3
744	14.6	34.3	M	3
745	14.6	34.4	M	3
746	14.6	33.8	F	3
747	14.6	33	F	3
748	14.6	33.5	F	3
749	14.6	33.8	F	3
750	14.6	33.6	M	3
751	14.6	33.2	M	3
752	14.6	33.2	F	3
753	14.6	34.1	M	3
754	14.6	34.3	F	3
755	14.6	34.4	F	3
756	14.6	33.8	F	3
757	14.6	33	F	3
758	14.6	33.5	F	3
759	14.6	33.8	F	3
760	14.6	33.6	F	3
761	14.7	34.1	F	3
762	14.7	34.8	F	3
763	14.7	33.5	M	3
764	14.7	33.4	M	3
765	14.7	34.2	M	3
766	14.7	34.1	M	3
767	14.7	34.8	M	3
768	14.7	33.5	M	3
769	14.7	33.4	F	3
770	14.7	34.2	F	3
771	14.8	35.2	F	3
772	14.8	34.5	F	3
773	14.8	34.6	F	3
774	14.8	34.7	M	3
775	14.8	35.5	M	3
776	14.8	35.6	F	3
777	14.8	35.8	F	3
778	14.8	34.2	F	3
779	14.8	35.2	F	3
780	14.8	34.5	M	3
781	14.8	34.6	M	3
782	14.8	34.7	F	3
783	14.8	35.5	M	3
784	14.8	35.6	F	3
785	14.8	35.8	F	3
786	14.8	34.2	F	3
787	14.9	34.1	F	3
788	14.9	34.1	F	3
789	14.9	34.1	F	3
790	14.9	34.1	F	3
791	14.9	34.1	F	3
792	14.9	34.1	F	3
793	14.9	34.1	M	3
794	14.9	34.1	M	3
795	14.9	34.1	M	3
796	14.9	34.1	M	3
797	14.9	34.1	M	3
798	14.9	34.1	M	3
799	14.9	34.1	F	3
800	14.9	34.1	F	3
801	14.9	34.1	F	3
802	14.9	34.1	F	3
803	14.9	34.1	F	3
804	15.2	35.9	M	4
805	15.2	36.1	M	4
806	15.2	35.9	M	4
807	15.2	36.1	M	4
808	15.2	35.9	F	4
809	15.2	36.1	F	4
810	15.2	35.9	F	4
811	15.2	36.1	F	4
812	15.2	35.9	M	4
813	15.2	36.1	M	4
814	15.2	35.9	F	4
815	15.2	36.1	M	4
816	15.2	35.9	F	4
817	15.2	36.1	F	4
818	15.2	35.9	F	4
819	15.2	36.1	F	4
820	15.2	35.9	F	4
821	15.2	36.1	F	4
822	15.2	35.9	M	4
823	15.2	36.1	M	4
824	15.2	35.9	M	4
825	15.2	35.9	M	4
826	15.2	36.1	M	4
827	15.2	35.9	F	4
828	15.2	36.1	F	4
829	15.2	35.9	F	4
830	15.2	36.1	F	4
831	15.2	35.9	M	4
832	15.2	36.1	M	4
833	15.2	35.9	F	4
834	15.2	36.1	M	4
835	15.2	35.9	F	4
836	15.2	36.1	F	4
837	15.2	36.1	F	4
838	15.2	35.9	F	4
839	15.2	36.1	F	4
840	15.3	36.5	F	4
841	15.3	36.5	M	4
842	15.3	36.5	M	4
843	15.3	36.5	M	4
844	15.3	36.5	M	4
845	15.3	36.5	F	4
846	15.3	36.5	F	4
847	15.3	36.5	F	4
848	15.3	36.5	F	4
849	15.3	36.5	F	4
850	15.3	36.5	F	4
851	15.3	36.5	M	4
852	15.3	36.5	M	4
853	15.4	36.2	M	4
854	15.4	37.1	M	4
855	15.4	37.4	F	4
856	15.4	36.5	F	4
857	15.4	37.5	F	4
858	15.4	37.9	M	4
859	15.4	37.4	M	4
860	15.4	37.8	M	4
861	15.4	38.5	M	4
862	15.4	36.2	F	4
863	15.4	37.1	F	4
864	15.4	37.4	F	4
865	15.4	36.5	F	4
866	15.4	37.5	F	4
867	15.4	37.9	F	4
868	15.4	37.4	M	4
869	15.4	37.8	M	4
870	15.4	38.5	M	4
871	15.5	38.4	F	4
872	15.5	38.8	F	4
873	15.5	38.9	F	4
874	15.5	38.1	F	4
875	15.5	38.8	F	4
876	15.5	38.5	F	4
877	15.5	38.4	M	4
878	15.5	38.8	F	4
879	15.5	38.9	F	4
880	15.5	38.1	M	4
881	15.5	38.8	M	4
882	15.5	38.5	M	4
883	15.6	38.5	F	4
884	15.6	38.5	F	4
885	15.6	38.5	M	4
886	15.6	38.5	M	4
887	15.6	38.5	M	4
888	15.6	38.5	F	4
889	15.6	38.5	F	4
890	15.6	38.5	F	4
891	15.6	38.5	F	4
892	15.6	38.5	F	4
893	15.6	38.5	F	4
894	15.6	38.5	M	4
895	15.6	38.5	F	4
896	15.6	38.5	F	4
897	15.7	39.9	M	4
898	15.7	39.9	M	4
899	15.7	39.9	M	4
900	15.7	39.9	F	4
901	15.7	39.9	F	4
902	15.7	39.9	F	4
903	15.7	39.9	F	4
904	15.7	39.9	F	4
905	15.8	39.5	F	4
906	15.8	39.5	M	4
907	15.8	39.5	F	4
908	15.8	39.5	F	4
909	15.8	39.5	M	4
910	15.8	39.5	M	4
911	15.8	39.5	M	4
912	15.8	39.5	F	4
913	15.8	39.5	F	4
914	15.8	39.5	F	4
915	15.8	39.5	F	4
916	15.8	39.5	F	4
917	15.8	39.5	M	4
918	15.8	39.5	M	4
919	15.8	39.5	M	4
920	15.8	39.5	M	4
921	15.9	39.6	M	4
922	15.9	39.6	M	4
923	15.9	39.6	F	4
924	15.9	39.6	F	4
925	15.9	39.6	F	4
926	15.9	39.6	M	4
927	15.9	39.6	M	4
928	15.9	39.6	M	4
929	15.9	39.6	F	4
930	15.9	39.6	F	4
931	15.9	39.6	F	4
932	15.9	39.6	F	4
933	15.9	39.6	F	4
934	15.9	39.6	F	4
935	15.9	39.6	M	4
936	15.9	39.6	M	4
937	16	41.2	M	4
938	16	42.5	F	4
939	16	41.6	F	4
940	16	41.3	F	4
941	16.1	42.9	F	4
942	16.1	42.5	F	4
943	16.1	43.1	F	4
944	16.1	43.9	M	4
945	16.2	42.5	M	4
946	16.2	43.5	M	4
947	16.2	42.9	F	4
948	16.2	42.8	F	4
949	16.2	43.6	F	4
950	16.2	43.1	M	4
951	16.2	42.1	M	4
952	16.2	43.8	F	4
953	16.2	43.9	F	4
954	16.2	43.2	F	4
955	16.2	44.1	F	4
956	16.2	43.1	F	4
957	16.2	43.2	F	4
958	16.2	42.5	M	4
959	16.2	43.1	F	4
960	16.2	42.8	F	4
961	16.2	41.9	M	4
962	16.2	42.2	M	4
963	16.2	43.8	F	4
964	16.2	42.5	F	4
965	16.3	43.8	F	4
966	16.3	43.8	F	4
967	16.3	43.8	F	4
968	16.3	43.8	M	4
969	16.3	43.8	M	4
970	16.3	43.8	F	4
971	16.3	43.8	F	4
972	16.3	43.8	M	4
973	16.3	43.8	M	4
974	16.3	43.8	F	4
975	16.3	43.8	F	4
976	16.3	43.8	F	4
977	16.3	43.8	F	4
978	16.3	43.8	M	4
979	16.3	43.8	M	4
980	16.3	43.8	F	4
981	16.3	43.8	F	4
982	16.4	43.2	M	4
983	16.4	44.5	F	4
984	16.4	44.2	F	4
985	16.4	45.1	M	4
986	16.4	44.9	M	4
987	16.4	44.1	F	4
988	16.4	44.9	F	4
989	16.4	44.2	F	4
990	16.4	45.2	F	4
991	16.4	44.2	F	4
992	16.4	44.2	M	4
993	16.4	45.2	M	4
994	16.4	44.2	F	4
995	16.4	44.2	F	4
996	16.4	45.2	F	4
997	16.4	44.2	F	4
998	16.4	44.2	F	4
999	16.4	45.2	M	4
1000	16.6	44.3	M	4
1001	16.6	44.5	F	4
1002	16.6	44.8	F	4
1003	16.6	45	F	4
1004	16.6	44.4	M	4
1005	16.6	44.2	M	4
1006	16.7	45.2	M	4
1007	16.7	45.3	M	4
1008	16.8	45.1	F	4
1009	16.8	45.2	F	4
1010	16.8	45	F	4
1011	16.8	45.5	F	4
